# Supplementary material for: A Machine Learning Tool to Predict the Antibacterial Capacity of Nanoparticles
Source: Nanomaterials (Basel). 2021 Jul 7;11(7):1774. doi: 10.3390/nano11071774 (PMC8308172; doi:10.3390/nano11071774)
Supplement: Supplementary file 1 [file nanomaterials-11-01774-s001.zip › nanomaterials-1248289-Supplementary Materials (S1)-Dataset.csv]

NPs	Coating	Core_size	Shape	Dose	Class	Family	Species	Duration	ZOI
AgNPs	Uncoated	68	NA	25000	Gammaproteobacteria	Enterobacteriaceae	E. coli	24	9.2
AgNPs	Uncoated	68	NA	25000	Gammaproteobacteria	Pseudomonadaceae	P. aeruginosa	24	10
AgNPs	Uncoated	68	NA	25000	Gammaproteobacteria	Enterobacteriaceae	Salmonella	24	9.1
AgNPs	Uncoated	68	NA	25000	Bacilli	Staphylococcaceae	S. aureus	24	10.1
AgNPs	Uncoated	68	NA	25000	Bacilli	Enterococcaceae	Enterococcus	24	8
AgNPs	Uncoated	68	NA	25000	Gammaproteobacteria	Enterobacteriaceae	K. pneumoniae	24	0
AgNPs	Uncoated	68	NA	25000	Gammaproteobacteria	Enterobacteriaceae	Shigella	24	0
AgNPs	Uncoated	68	NA	25000	Gammaproteobacteria	Morganellaceae	P. mirabilis	24	9
AgNPs	Uncoated	68	NA	50000	Gammaproteobacteria	Enterobacteriaceae	E. coli	24	12
AgNPs	Uncoated	68	NA	50000	Gammaproteobacteria	Pseudomonadaceae	P. aeruginosa	24	10
AgNPs	Uncoated	68	NA	50000	Gammaproteobacteria	Enterobacteriaceae	Salmonella	24	11
AgNPs	Uncoated	68	NA	50000	Bacilli	Staphylococcaceae	S. aureus	24	9
AgNPs	Uncoated	68	NA	50000	Bacilli	Enterococcaceae	Enterococcus	24	9
AgNPs	Uncoated	68	NA	50000	Gammaproteobacteria	Enterobacteriaceae	K. pneumoniae	24	0
AgNPs	Uncoated	68	NA	50000	Gammaproteobacteria	Enterobacteriaceae	Shigella	24	0
AgNPs	Uncoated	68	NA	50000	Gammaproteobacteria	Morganellaceae	P. mirabilis	24	10
AgNPs	Uncoated	68	NA	75000	Gammaproteobacteria	Enterobacteriaceae	E. coli	24	12
AgNPs	Uncoated	68	NA	75000	Gammaproteobacteria	Pseudomonadaceae	P. aeruginosa	24	12
AgNPs	Uncoated	68	NA	75000	Gammaproteobacteria	Enterobacteriaceae	Salmonella	24	11
AgNPs	Uncoated	68	NA	75000	Bacilli	Staphylococcaceae	S. aureus	24	10
AgNPs	Uncoated	68	NA	75000	Bacilli	Enterococcaceae	Enterococcus	24	10
AgNPs	Uncoated	68	NA	75000	Gammaproteobacteria	Enterobacteriaceae	K. pneumoniae	24	0
AgNPs	Uncoated	68	NA	75000	Gammaproteobacteria	Enterobacteriaceae	Shigella	24	0
AgNPs	Uncoated	68	NA	75000	Gammaproteobacteria	Morganellaceae	P. mirabilis	24	10
AgNPs	Uncoated	68	NA	100000	Gammaproteobacteria	Enterobacteriaceae	E. coli	24	13
AgNPs	Uncoated	68	NA	100000	Gammaproteobacteria	Pseudomonadaceae	P. aeruginosa	24	12
AgNPs	Uncoated	68	NA	100000	Gammaproteobacteria	Enterobacteriaceae	Salmonella	24	12
AgNPs	Uncoated	68	NA	100000	Bacilli	Staphylococcaceae	S. aureus	24	11
AgNPs	Uncoated	68	NA	100000	Bacilli	Enterococcaceae	Enterococcus	24	11
AgNPs	Uncoated	68	NA	100000	Gammaproteobacteria	Enterobacteriaceae	K. pneumoniae	24	0
AgNPs	Uncoated	68	NA	100000	Gammaproteobacteria	Enterobacteriaceae	Shigella	24	0
AgNPs	Uncoated	68	NA	100000	Gammaproteobacteria	Morganellaceae	P. mirabilis	120	13
AgNPs	Uncoated	68	NA	25000	Saccharomycetes	Debaryomycetaceae	C. tropicalis	120	0
AgNPs	Uncoated	68	NA	25000	Sordariomycetes	Nectriaceae	Fusarium	120	16
AgNPs	Uncoated	68	NA	25000	Sordariomycetes	Microascaceae	Scedosporium	120	0
AgNPs	Uncoated	68	NA	25000	Sordariomycetes	Ganodermataceae	Ganoderma	120	0
AgNPs	Uncoated	68	NA	25000	Fungal	Trichocomaceae	A. terreus	120	11
AgNPs	Uncoated	68	NA	50000	Saccharomycetes	Debaryomycetaceae	C. tropicalis	120	0
AgNPs	Uncoated	68	NA	50000	Sordariomycetes	Nectriaceae	Fusarium	120	17
AgNPs	Uncoated	68	NA	50000	Sordariomycetes	Microascaceae	Scedosporium	120	0
AgNPs	Uncoated	68	NA	50000	Agaricomycetes	Ganodermataceae	Ganoderma	120	0
AgNPs	Uncoated	68	NA	50000	Fungal	Trichocomaceae	A. terreus	120	13
AgNPs	Uncoated	68	NA	75000	Saccharomycetes	Debaryomycetaceae	C. tropicalis	120	0
AgNPs	Uncoated	68	NA	75000	Sordariomycetes	Nectriaceae	Fusarium	120	17
AgNPs	Uncoated	68	NA	75000	Sordariomycetes	Microascaceae	Scedosporium	120	0
AgNPs	Uncoated	68	NA	75000	Agaricomycetes	Ganodermataceae	Ganoderma	120	0
AgNPs	Uncoated	68	NA	75000	Fungal	Trichocomaceae	A. terreus	120	15
AgNPs	Uncoated	68	NA	100000	Saccharomycetes	Debaryomycetaceae	C. tropicalis	120	0
AgNPs	Uncoated	68	NA	100000	Sordariomycetes	Nectriaceae	Fusarium	120	21
AgNPs	Uncoated	68	NA	100000	Sordariomycetes	Microascaceae	Scedosporium	120	0
AgNPs	Uncoated	68	NA	100000	Agaricomycetes	Ganodermataceae	Ganoderma	120	0
AgNPs	Uncoated	68	NA	100000	Fungal	Trichocomaceae	A. terreus	120	16
AgNPs	Coated	7.5	Spherical	200	Bacilli	Bacillaceae	B. subtilis	24	32
AgNPs	Coated	7.5	Spherical	200	Bacilli	Bacillaceae	B. cereus	24	28
AgNPs	Coated	7.5	Spherical	200	Gammaproteobacteria	Enterobacteriaceae	E. coli	24	21
AgNPs	Coated	7.5	Spherical	200	Bacilli	Staphylococcaceae	S. aureus	24	36
AgNPs	Coated	7.5	Spherical	200	Gammaproteobacteria	Pseudomonadaceae	P. aeruginosa	24	24
AgNPs	Coated	16	Spherical	200	Gammaproteobacteria	Enterobacteriaceae	E. coli	24	10
AgNPs	Coated	16	Spherical	500	Gammaproteobacteria	Enterobacteriaceae	E. coli	24	11
AgNPs	Coated	16	Spherical	700	Gammaproteobacteria	Enterobacteriaceae	E. coli	24	11
AgNPs	Coated	16	Spherical	1000	Gammaproteobacteria	Enterobacteriaceae	E. coli	24	11
AgNPs	Coated	16	Spherical	2000	Gammaproteobacteria	Enterobacteriaceae	E. coli	24	13
AgNPs	Coated	16	Spherical	200	Gammaproteobacteria	Enterobacteriaceae	K. pneumoniae	24	9
AgNPs	Coated	16	Spherical	500	Gammaproteobacteria	Enterobacteriaceae	K. pneumoniae	24	10
AgNPs	Coated	16	Spherical	700	Gammaproteobacteria	Enterobacteriaceae	K. pneumoniae	24	11
AgNPs	Coated	16	Spherical	1000	Gammaproteobacteria	Enterobacteriaceae	K. pneumoniae	24	12
AgNPs	Coated	16	Spherical	2000	Gammaproteobacteria	Enterobacteriaceae	K. pneumoniae	24	12
AgNPs	Coated	16	Spherical	200	Gammaproteobacteria	Pseudomonadaceae	P. aeruginosa	24	12
AgNPs	Coated	16	Spherical	500	Gammaproteobacteria	Pseudomonadaceae	P. aeruginosa	24	13
AgNPs	Coated	16	Spherical	700	Gammaproteobacteria	Pseudomonadaceae	P. aeruginosa	24	13
AgNPs	Coated	16	Spherical	1000	Gammaproteobacteria	Pseudomonadaceae	P. aeruginosa	24	14
AgNPs	Coated	16	Spherical	2000	Gammaproteobacteria	Pseudomonadaceae	P. aeruginosa	24	15
AgNPs	Coated	16	Spherical	200	Bacilli	Listeriaceae	L. monocytogenes	24	9
AgNPs	Coated	16	Spherical	500	Bacilli	Listeriaceae	L. monocytogenes	24	9
AgNPs	Coated	16	Spherical	700	Bacilli	Listeriaceae	L. monocytogenes	24	9
AgNPs	Coated	16	Spherical	1000	Bacilli	Listeriaceae	L. monocytogenes	24	10
AgNPs	Coated	16	Spherical	2000	Bacilli	Listeriaceae	L. monocytogenes	24	10
AgNPs	Coated	16	Spherical	200	Eurotiomycetes	Trichocomaceae	Aspergillus	24	13
AgNPs	Coated	16	Spherical	500	Eurotiomycetes	Trichocomaceae	Aspergillus	24	15
AgNPs	Coated	16	Spherical	700	Eurotiomycetes	Trichocomaceae	Aspergillus	24	17
AgNPs	Coated	16	Spherical	1000	Eurotiomycetes	Trichocomaceae	Aspergillus	24	18
AgNPs	Coated	16	Spherical	2000	Eurotiomycetes	Trichocomaceae	Aspergillus	24	23
AgNPs	Coated	16	Spherical	200	Eurotiomycetes	Trichocomaceae	Penicillium	24	8
AgNPs	Coated	16	Spherical	500	Eurotiomycetes	Trichocomaceae	Penicillium	24	12
AgNPs	Coated	16	Spherical	700	Eurotiomycetes	Trichocomaceae	Penicillium	24	13
AgNPs	Coated	16	Spherical	1000	Eurotiomycetes	Trichocomaceae	Penicillium	24	14
AgNPs	Coated	16	Spherical	2000	Eurotiomycetes	Trichocomaceae	Penicillium	24	15
AgNPs	Coated	546	Spherical	NA	Bacilli	Enterococcaceae	E. faecalis	24	10
AgNPs	Coated	546	Spherical	NA	Gammaproteobacteria	Pseudomonadaceae	P. aeruginosa	24	11
AgNPs	Uncoated	NA	Spherical	25000	Gammaproteobacteria	Pseudomonadaceae	P. putida	24	2.7
AgNPs	Uncoated	NA	Spherical	25000	Bacilli	Bacillaceae	B. subtilis	24	1.5
AgNPs	Uncoated	NA	Spherical	25000	Bacilli	Staphylococcaceae	S. aureus	24	1.9
AgNPs	Uncoated	NA	Spherical	25000	Gammaproteobacteria	Pseudomonadaceae	P. putida	24	5.1
AgNPs	Uncoated	NA	Spherical	25000	Bacilli	Bacillaceae	B. subtilis	24	5
AgNPs	Uncoated	NA	Spherical	25000	Bacilli	Staphylococcaceae	S. aureus	24	3.2
AgNPs	Uncoated	NA	Spherical	25000	Gammaproteobacteria	Pseudomonadaceae	P. putida	24	5.8
AgNPs	Uncoated	NA	Spherical	25000	Bacilli	Bacillaceae	B. subtilis	24	6.3
AgNPs	Uncoated	NA	Spherical	25000	Bacilli	Staphylococcaceae	S. aureus	24	4.9
Fe3O4	Coated	82	Spherical	0.625	Bacilli	Staphylococcaceae	S. aureus	24	0
Fe3O4	Coated	82	Spherical	1.25	Bacilli	Staphylococcaceae	S. aureus	24	0
Fe3O4	Coated	82	Spherical	2.5	Bacilli	Staphylococcaceae	S. aureus	24	15
Fe3O4	Coated	82	Spherical	5	Bacilli	Staphylococcaceae	S. aureus	24	20.4
Fe3O4	Coated	82	Spherical	10	Bacilli	Staphylococcaceae	S. aureus	24	30.3
Fe3O4	Coated	82	Spherical	0.625	Gammaproteobacteria	Enterobacteriaceae	E. coli	24	0
Fe3O4	Coated	82	Spherical	1.25	Gammaproteobacteria	Enterobacteriaceae	E. coli	24	0
Fe3O4	Coated	82	Spherical	2.5	Gammaproteobacteria	Enterobacteriaceae	E. coli	24	10.2
Fe3O4	Coated	82	Spherical	5	Gammaproteobacteria	Enterobacteriaceae	E. coli	24	20.3
Fe3O4	Coated	82	Spherical	10	Gammaproteobacteria	Enterobacteriaceae	E. coli	24	25.2
Fe3O4	Coated	75	Spherical	10	Bacilli	Staphylococcaceae	S. aureus	24	12.3
Fe3O4	Coated	75	Spherical	10	Gammaproteobacteria	Enterobacteriaceae	E. coli	24	8.4
Fe3O4	Coated	76	Rod	10	Bacilli	Staphylococcaceae	S. aureus	24	18.4
Fe3O4	Coated	76	Rod	10	Gammaproteobacteria	Enterobacteriaceae	E. coli	24	14.2
Fe3O4	Coated	82	Spherical	10	Gammaproteobacteria	Enterobacteriaceae	E. coli	24	20
Fe3O4	Coated	82	Spherical	10	Gammaproteobacteria	Enterobacteriaceae	S. typhi	24	24
Fe3O4	Coated	82	Spherical	10	Bacilli	Staphylococcaceae	S. aureus	24	26
Fe3O4	Coated	82	Spherical	10	Gammaproteobacteria	Enterobacteriaceae	Shigella	24	24
Fe3O4	Coated	82	Spherical	10	Gammaproteobacteria	Pasteurellaceae	P. multocida	24	18
Fe3O4	Coated	82	Spherical	10	Gammaproteobacteria	Pseudomonadaceae	P. aeruginosa	24	16
Fe3O4	Coated	75	Spherical	10	Gammaproteobacteria	Enterobacteriaceae	E. coli	24	8.4
Fe3O4	Coated	75	Spherical	10	Gammaproteobacteria	Enterobacteriaceae	S. typhi	24	1.3
Fe3O4	Coated	75	Spherical	10	Bacilli	Staphylococcaceae	S. aureus	24	12.3
Fe3O4	Coated	75	Spherical	10	Gammaproteobacteria	Enterobacteriaceae	Shigella	24	18.4
Fe3O4	Coated	75	Spherical	10	Gammaproteobacteria	Pasteurellaceae	P. multocida	24	16.4
Fe3O4	Coated	75	Spherical	10	Gammaproteobacteria	Pseudomonadaceae	P. aeruginosa	24	16.2
Fe3O4	Coated	76	Rod	10	Gammaproteobacteria	Enterobacteriaceae	E. coli	24	14.2
Fe3O4	Coated	76	Rod	10	Gammaproteobacteria	Enterobacteriaceae	S. typhi	24	16.1
Fe3O4	Coated	76	Rod	10	Bacilli	Staphylococcaceae	S. aureus	24	18.4
Fe3O4	Coated	76	Rod	10	Gammaproteobacteria	Enterobacteriaceae	Shigella	24	18.2
Fe3O4	Coated	76	Rod	10	Gammaproteobacteria	Pasteurellaceae	P. multocida	24	16.5
Fe3O4	Coated	76	Rod	10	Gammaproteobacteria	Pseudomonadaceae	P. aeruginosa	24	14.2
Fe3O4	Coated	38	Spherical	10	Bacilli	Staphylococcaceae	S. aureus	24	12
Fe3O4	Coated	38	Spherical	10	Bacilli	Staphylococcaceae	S. aureus	48	12.5
Fe3O4	Coated	38	Spherical	50	Bacilli	Staphylococcaceae	S. aureus	24	13.5
Fe3O4	Coated	38	Spherical	50	Bacilli	Staphylococcaceae	S. aureus	48	14
Fe3O4	Coated	38	Spherical	10	Gammaproteobacteria	Enterobacteriaceae	E. coli	24	11
Fe3O4	Coated	38	Spherical	10	Gammaproteobacteria	Enterobacteriaceae	E. coli	48	12
Fe3O4	Coated	38	Spherical	50	Gammaproteobacteria	Enterobacteriaceae	E. coli	24	14
Fe3O4	Coated	38	Spherical	50	Gammaproteobacteria	Enterobacteriaceae	E. coli	48	14.5
Fe3O4	Coated	38	Spherical	10	Gammaproteobacteria	Enterobacteriaceae	S. dysenteriae	24	11
Fe3O4	Coated	38	Spherical	10	Gammaproteobacteria	Enterobacteriaceae	S. dysenteriae	48	12.5
Fe3O4	Coated	38	Spherical	50	Gammaproteobacteria	Enterobacteriaceae	S. dysenteriae	24	13.5
Fe3O4	Coated	38	Spherical	50	Gammaproteobacteria	Enterobacteriaceae	S. dysenteriae	48	13
Fe3O4	Coated	11	Spherical	30	Gammaproteobacteria	Enterobacteriaceae	E. coli	48	16
Fe3O4	Coated	11	Spherical	30	Bacilli	Bacillaceae	B. subtilis	48	18
Fe3O4	Coated	11	Spherical	30	Sordariomycetes	Nectriaceae	F. solani	48	15
Fe3O4	Coated	11	Spherical	30	Saccharomycetes	Saccharomycetaceae	C. albicans	48	16
Fe3O4	Coated	11	Spherical	30	Eurotiomycetes	Trichocomaceae	A. niger	48	15
Fe3O4	Coated	10	Spherical	10	Bacilli	Staphylococcaceae	S. aureus	24	13
Fe3O4	Coated	10	Spherical	50	Bacilli	Staphylococcaceae	S. aureus	24	16
Fe3O4	Coated	10	Spherical	100	Bacilli	Staphylococcaceae	S. aureus	24	19
Fe3O4	Coated	10	Spherical	150	Bacilli	Staphylococcaceae	S. aureus	24	29
Fe3O4	Coated	10	Spherical	10	Gammaproteobacteria	Enterobacteriaceae	E. coli	24	10
Fe3O4	Coated	10	Spherical	50	Gammaproteobacteria	Enterobacteriaceae	E. coli	24	12
Fe3O4	Coated	10	Spherical	100	Gammaproteobacteria	Enterobacteriaceae	E. coli	24	17
Fe3O4	Coated	10	Spherical	150	Gammaproteobacteria	Enterobacteriaceae	E. coli	24	26
Fe3O4	Coated	10	Spherical	10	Gammaproteobacteria	Pseudomonadaceae	P. aeruginosa	24	11
Fe3O4	Coated	10	Spherical	50	Gammaproteobacteria	Pseudomonadaceae	P. aeruginosa	24	13
Fe3O4	Coated	10	Spherical	100	Gammaproteobacteria	Pseudomonadaceae	P. aeruginosa	24	16
Fe3O4	Coated	10	Spherical	150	Gammaproteobacteria	Pseudomonadaceae	P. aeruginosa	24	28
Fe3O4	Uncoated	42	Spherical	0.01	Bacilli	Bacillaceae	B. cereus	24	1.5
Fe3O4	Uncoated	42	Spherical	0.02	Bacilli	Bacillaceae	B. cereus	24	3.5
Fe3O4	Coated	42	Spherical	0.01	Bacilli	Bacillaceae	B. cereus	24	3.75
Fe3O4	Coated	42	Spherical	0.02	Bacilli	Bacillaceae	B. cereus	24	8.5
Fe3O4	Uncoated	65	Spherical	50000	Bacilli	Staphylococcaceae	S. aureus	24	12
Fe3O4	Uncoated	65	Spherical	50000	Gammaproteobacteria	Enterobacteriaceae	S. dysenteriae	24	0
Fe3O4	Uncoated	65	NA	50000	Bacilli	Bacillaceae	B. licheniformis	24	23
Fe3O4	Uncoated	65	Spherical	50000	Bacilli	Paenibacillaceae	B. brevis	24	9
Fe3O4	Uncoated	65	Spherical	50000	Gammaproteobacteria	Vibrionaceae	V. cholerae	24	9
Fe3O4	Uncoated	65	Spherical	50000	Gammaproteobacteria	Pseudomonadaceae	P. aeruginosa	24	0
Fe3O4	Uncoated	65	Spherical	50000	Bacilli	Staphylococcaceae	S. aureus	24	12
Fe3O4	Uncoated	65	Spherical	50000	Bacilli	Staphylococcaceae	S. epidermidis	24	14
Fe3O4	Uncoated	65	Spherical	50000	Bacilli	Bacillaceae	B. subtilis	24	21
Fe3O4	Uncoated	65	Spherical	50000	Gammaproteobacteria	Enterobacteriaceae	E. coli	24	11
Fe3O4	Coated	16	Spherical	10	Gammaproteobacteria	Pseudomonadaceae	P. aeruginosa	72	22
Fe3O4	Coated	16	Spherical	10	Gammaproteobacteria	Pseudomonadaceae	P. aeruginosa	1440	21
Fe3O4	Coated	16	Spherical	5	Gammaproteobacteria	Pseudomonadaceae	P. aeruginosa	72	17.5
Fe3O4	Coated	16	Spherical	5	Gammaproteobacteria	Pseudomonadaceae	P. aeruginosa	1440	16
Fe3O4	Coated	16	Spherical	2.5	Gammaproteobacteria	Pseudomonadaceae	P. aeruginosa	72	11
Fe3O4	Coated	16	Spherical	2.5	Gammaproteobacteria	Pseudomonadaceae	P. aeruginosa	1440	10
Fe3O4	Coated	14	NA	10	Gammaproteobacteria	Pseudomonadaceae	P. aeruginosa	72	22
Fe3O4	Coated	14	NA	10	Gammaproteobacteria	Pseudomonadaceae	P. aeruginosa	1440	22
Fe3O4	Coated	14	NA	5	Gammaproteobacteria	Pseudomonadaceae	P. aeruginosa	72	16
Fe3O4	Coated	14	NA	5	Gammaproteobacteria	Pseudomonadaceae	P. aeruginosa	1440	15
Fe3O4	Coated	14	NA	2.5	Gammaproteobacteria	Pseudomonadaceae	P. aeruginosa	72	10
Fe3O4	Coated	14	NA	2.5	Gammaproteobacteria	Pseudomonadaceae	P. aeruginosa	1440	8
Fe3O4	Coated	14	NA	10	Gammaproteobacteria	Pseudomonadaceae	P. aeruginosa	72	24
Fe3O4	Coated	14	NA	10	Gammaproteobacteria	Pseudomonadaceae	P. aeruginosa	1440	21
Fe3O4	Coated	14	NA	5	Gammaproteobacteria	Pseudomonadaceae	P. aeruginosa	72	22
Fe3O4	Coated	14	NA	5	Gammaproteobacteria	Pseudomonadaceae	P. aeruginosa	1440	20
Fe3O4	Coated	14	NA	2.5	Gammaproteobacteria	Pseudomonadaceae	P. aeruginosa	72	20
Fe3O4	Coated	14	NA	2.5	Gammaproteobacteria	Pseudomonadaceae	P. aeruginosa	1440	0
Fe3O4	Coated	14	NA	10	Gammaproteobacteria	Pseudomonadaceae	P. aeruginosa	72	0
Fe3O4	Coated	14	NA	10	Gammaproteobacteria	Pseudomonadaceae	P. aeruginosa	1440	0
Fe3O4	Coated	14	NA	5	Gammaproteobacteria	Pseudomonadaceae	P. aeruginosa	72	0
Fe3O4	Coated	14	NA	5	Gammaproteobacteria	Pseudomonadaceae	P. aeruginosa	1440	0
Fe3O4	Coated	14	NA	2.5	Gammaproteobacteria	Pseudomonadaceae	P. aeruginosa	72	0
Fe3O4	Uncoated	35	cubic	25	Bacilli	Staphylococcaceae	S. aureus	24	12
Fe3O4	Uncoated	35	cubic	30	Bacilli	Staphylococcaceae	S. aureus	24	14
Fe3O4	Uncoated	35	cubic	40	Bacilli	Staphylococcaceae	S. aureus	24	15
Fe3O4	Uncoated	35	cubic	50	Bacilli	Staphylococcaceae	S. aureus	24	11
Fe3O4	Uncoated	35	cubic	60	Bacilli	Staphylococcaceae	S. aureus	24	12
Fe3O4	Uncoated	35	cubic	80	Bacilli	Staphylococcaceae	S. aureus	24	15
Fe3O4	Uncoated	35	cubic	100	Bacilli	Staphylococcaceae	S. aureus	24	10
Fe3O4	Uncoated	35	cubic	25	Gammaproteobacteria	Xanthomonadaceae	Xanthomonas	24	12
Fe3O4	Uncoated	35	cubic	30	Gammaproteobacteria	Xanthomonadaceae	Xanthomonas	24	14
Fe3O4	Uncoated	35	cubic	40	Gammaproteobacteria	Xanthomonadaceae	Xanthomonas	24	15
Fe3O4	Uncoated	35	cubic	50	Gammaproteobacteria	Xanthomonadaceae	Xanthomonas	24	8
Fe3O4	Uncoated	35	cubic	60	Gammaproteobacteria	Xanthomonadaceae	Xanthomonas	24	13
Fe3O4	Uncoated	35	cubic	80	Gammaproteobacteria	Xanthomonadaceae	Xanthomonas	24	15
Fe3O4	Uncoated	35	cubic	100	Gammaproteobacteria	Xanthomonadaceae	Xanthomonas	24	15
Fe3O4	Uncoated	35	cubic	25	Gammaproteobacteria	Enterobacteriaceae	E. coli	24	16
Fe3O4	Uncoated	35	cubic	30	Gammaproteobacteria	Enterobacteriaceae	E. coli	24	17
Fe3O4	Uncoated	35	cubic	40	Gammaproteobacteria	Enterobacteriaceae	E. coli	24	18
Fe3O4	Uncoated	35	cubic	50	Gammaproteobacteria	Enterobacteriaceae	E. coli	24	15
Fe3O4	Uncoated	35	cubic	60	Gammaproteobacteria	Enterobacteriaceae	E. coli	24	16
Fe3O4	Uncoated	35	cubic	80	Gammaproteobacteria	Enterobacteriaceae	E. coli	24	21
Fe3O4	Uncoated	35	cubic	100	Gammaproteobacteria	Enterobacteriaceae	E. coli	24	11
Fe3O4	Uncoated	35	cubic	25	Gammaproteobacteria	Morganellaceae	P. vulgaris	24	12
Fe3O4	Uncoated	35	cubic	30	Gammaproteobacteria	Morganellaceae	P. vulgaris	24	15
Fe3O4	Uncoated	35	cubic	40	Gammaproteobacteria	Morganellaceae	P. vulgaris	24	2
Fe3O4	Uncoated	35	cubic	50	Gammaproteobacteria	Morganellaceae	P. vulgaris	24	2
Fe3O4	Uncoated	35	cubic	60	Gammaproteobacteria	Morganellaceae	P. vulgaris	24	12
Fe3O4	Uncoated	35	cubic	80	Gammaproteobacteria	Morganellaceae	P. vulgaris	24	21
Fe3O4	Uncoated	20	Spherical	12.5	Gammaproteobacteria	Enterobacteriaceae	E. coli	24	7
Fe3O4	Uncoated	20	Spherical	25	Gammaproteobacteria	Enterobacteriaceae	E. coli	24	8
Fe3O4	Uncoated	20	Spherical	50	Gammaproteobacteria	Enterobacteriaceae	E. coli	24	0
Fe3O4	Uncoated	20	Spherical	12.5	Gammaproteobacteria	Enterobacteriaceae	E. coli	24	8
Fe3O4	Uncoated	20	Spherical	25	Gammaproteobacteria	Enterobacteriaceae	E. coli	24	10
Fe3O4	Uncoated	20	Spherical	50	Gammaproteobacteria	Enterobacteriaceae	E. coli	24	11
Fe3O4	Uncoated	20	Spherical	12.5	Gammaproteobacteria	Enterobacteriaceae	E. coli	24	12
Fe3O4	Uncoated	20	Spherical	25	Gammaproteobacteria	Enterobacteriaceae	E. coli	24	13
Fe3O4	Uncoated	20	Spherical	50	Gammaproteobacteria	Enterobacteriaceae	E. coli	24	7
Fe3O4	Uncoated	20	Spherical	12.5	Gammaproteobacteria	Morganellaceae	P. mirabilis	24	7
Fe3O4	Uncoated	20	Spherical	25	Gammaproteobacteria	Morganellaceae	P. mirabilis	24	8
Fe3O4	Uncoated	20	Spherical	50	Gammaproteobacteria	Morganellaceae	P. mirabilis	24	9
Fe3O4	Uncoated	20	Spherical	12.5	Gammaproteobacteria	Morganellaceae	P. mirabilis	24	10
Fe3O4	Uncoated	20	Spherical	25	Gammaproteobacteria	Morganellaceae	P. mirabilis	24	12
Fe3O4	Uncoated	20	Spherical	50	Gammaproteobacteria	Morganellaceae	P. mirabilis	24	16
Fe3O4	Uncoated	20	Spherical	12.5	Gammaproteobacteria	Morganellaceae	P. mirabilis	24	17
Fe3O4	Uncoated	20	Spherical	25	Gammaproteobacteria	Morganellaceae	P. mirabilis	24	18
Fe3O4	Uncoated	20	Spherical	50	Gammaproteobacteria	Morganellaceae	P. mirabilis	24	7
Fe3O4	Uncoated	20	Spherical	12.5	Bacilli	Bacillaceae	B. subtilis	24	7
Fe3O4	Uncoated	20	Spherical	25	Bacilli	Bacillaceae	B. subtilis	24	8
Fe3O4	Uncoated	20	Spherical	50	Bacilli	Bacillaceae	B. subtilis	24	0
Fe3O4	Uncoated	20	Spherical	12.5	Bacilli	Bacillaceae	B. subtilis	24	8
Fe3O4	Uncoated	20	Spherical	25	Bacilli	Bacillaceae	B. subtilis	24	9
Fe3O4	Uncoated	20	Spherical	50	Bacilli	Bacillaceae	B. subtilis	24	7
Fe3O4	Uncoated	20	Spherical	12.5	Bacilli	Bacillaceae	B. subtilis	24	8
Fe3O4	Uncoated	20	Spherical	25	Bacilli	Bacillaceae	B. subtilis	24	10
Fe3O4	Uncoated	20	Spherical	50	Bacilli	Bacillaceae	B. subtilis	24	8
Fe3O4	Uncoated	NA	Spherical	62	Gammaproteobacteria	Pseudomonadaceae	P. aeruginosa	24	23
Fe3O4	Uncoated	NA	Spherical	62	Gammaproteobacteria	Pseudomonadaceae	P. aeruginosa	24	14
Fe3O4	Uncoated	NA	Spherical	62	Gammaproteobacteria	Pseudomonadaceae	P. aeruginosa	24	18
Fe3O4	Uncoated	73	Spherical	2000	Gammaproteobacteria	Enterobacteriaceae	E. coli	24	22
Fe3O4	Uncoated	84.16	Spherical	4000	Gammaproteobacteria	Enterobacteriaceae	E. coli	24	18
Fe3O4	Uncoated	98	Spherical	6000	Gammaproteobacteria	Enterobacteriaceae	E. coli	24	18
Fe3O4	Uncoated	109.63	Spherical	8000	Gammaproteobacteria	Enterobacteriaceae	E. coli	24	17
Fe3O4	Uncoated	73	Spherical	2000	Gammaproteobacteria	Pseudomonadaceae	P. aeruginosa	24	16
Fe3O4	Uncoated	84.16	Spherical	4000	Gammaproteobacteria	Pseudomonadaceae	P. aeruginosa	24	27
Fe3O4	Uncoated	98	Spherical	6000	Gammaproteobacteria	Pseudomonadaceae	P. aeruginosa	24	25
Fe3O4	Uncoated	109.63	Spherical	8000	Gammaproteobacteria	Pseudomonadaceae	P. aeruginosa	24	20
Fe3O4	Uncoated	73	Spherical	2000	Gammaproteobacteria	Yersiniaceae	S. marcescens	24	24
Fe3O4	Uncoated	84.16	Spherical	4000	Gammaproteobacteria	Yersiniaceae	S. marcescens	24	19
Fe3O4	Uncoated	98	Spherical	6000	Gammaproteobacteria	Yersiniaceae	S. marcescens	24	18
Fe3O4	Uncoated	109.63	Spherical	8000	Gammaproteobacteria	Yersiniaceae	S. marcescens	24	21
Fe3O4	Uncoated	73	Spherical	2000	Bacilli	Staphylococcaceae	S. aureus	24	19
Fe3O4	Uncoated	84.16	Spherical	4000	Bacilli	Staphylococcaceae	S. aureus	24	22
Fe3O4	Uncoated	98	Spherical	6000	Bacilli	Staphylococcaceae	S. aureus	24	22
Fe3O4	Uncoated	109.63	Spherical	8000	Bacilli	Staphylococcaceae	S. aureus	24	24
Fe3O4	Uncoated	76	Spherical	2000	Gammaproteobacteria	Enterobacteriaceae	E. coli	24	26
Fe3O4	Uncoated	95.05	Spherical	4000	Gammaproteobacteria	Enterobacteriaceae	E. coli	24	20
Fe3O4	Uncoated	98	Spherical	6000	Gammaproteobacteria	Enterobacteriaceae	E. coli	24	20
Fe3O4	Uncoated	NA	Spherical	8000	Gammaproteobacteria	Enterobacteriaceae	E. coli	24	13
Fe3O4	Uncoated	76	Spherical	2000	Gammaproteobacteria	Pseudomonadaceae	P. aeruginosa	24	12
Fe3O4	Uncoated	95.05	Spherical	4000	Gammaproteobacteria	Pseudomonadaceae	P. aeruginosa	24	20
Fe3O4	Uncoated	98	Spherical	6000	Gammaproteobacteria	Pseudomonadaceae	P. aeruginosa	24	17
Fe3O4	Uncoated	NA	Spherical	8000	Gammaproteobacteria	Pseudomonadaceae	P. aeruginosa	24	27
Fe3O4	Uncoated	76	Spherical	2000	Gammaproteobacteria	Yersiniaceae	S. marcescens	24	28
Fe3O4	Uncoated	95.05	Spherical	4000	Gammaproteobacteria	Yersiniaceae	S. marcescens	24	15
Fe3O4	Uncoated	98	Spherical	6000	Gammaproteobacteria	Yersiniaceae	S. marcescens	24	15
Fe3O4	Uncoated	NA	Spherical	8000	Gammaproteobacteria	Yersiniaceae	S. marcescens	24	29
Fe3O4	Uncoated	76	Spherical	2000	Bacilli	Staphylococcaceae	S. aureus	24	32
Fe3O4	Uncoated	95.05	Spherical	4000	Bacilli	Staphylococcaceae	S. aureus	24	27
Fe3O4	Uncoated	98	Spherical	6000	Bacilli	Staphylococcaceae	S. aureus	24	30
Fe3O4	Uncoated	NA	Spherical	8000	Bacilli	Staphylococcaceae	S. aureus	24	20
ZNO	Uncoated	3.9	Spherical	4	Gammaproteobacteria	Xanthomonadaceae	X. oryzae	24	2.5
ZNO	Uncoated	3.9	Spherical	8	Gammaproteobacteria	Xanthomonadaceae	X. oryzae	24	2.5
ZNO	Uncoated	3.9	Spherical	16	Gammaproteobacteria	Xanthomonadaceae	X. oryzae	24	17
ZNO	Coated	3.9	Spherical	4	Gammaproteobacteria	Xanthomonadaceae	X. oryzae	24	2
ZNO	Coated	3.9	Spherical	8	Gammaproteobacteria	Xanthomonadaceae	X. oryzae	24	2.3
ZNO	Coated	3.9	Spherical	16	Gammaproteobacteria	Xanthomonadaceae	X. oryzae	24	2.4
ZNO	Uncoated	12	Spherical	500	Gammaproteobacteria	Enterobacteriaceae	E. coli	24	20
ZNO	Uncoated	12	Spherical	500	Bacilli	Staphylococcaceae	S. aureus	24	18
ZNO	Uncoated	34	Spherical	25	Bacilli	Bacillaceae	B. cereus	36	26
ZNO	Uncoated	34	Spherical	50	Bacilli	Bacillaceae	B. cereus	36	30
ZNO	Uncoated	34	Spherical	75	Bacilli	Bacillaceae	B. cereus	36	35
ZNO	Uncoated	34	Spherical	100	Bacilli	Bacillaceae	B. cereus	36	41
ZNO	Uncoated	34	Spherical	25	Bacilli	Staphylococcaceae	S. aureus	36	22
ZNO	Uncoated	34	Spherical	50	Bacilli	Staphylococcaceae	S. aureus	36	25
ZNO	Uncoated	34	Spherical	75	Bacilli	Staphylococcaceae	S. aureus	36	30
ZNO	Uncoated	34	Spherical	100	Bacilli	Staphylococcaceae	S. aureus	36	36
ZNO	Uncoated	34	Spherical	25	Gammaproteobacteria	Enterobacteriaceae	S. dysenteriae	36	35
ZNO	Uncoated	34	Spherical	50	Gammaproteobacteria	Enterobacteriaceae	S. dysenteriae	36	38
ZNO	Uncoated	34	Spherical	75	Gammaproteobacteria	Enterobacteriaceae	S. dysenteriae	36	40
ZNO	Uncoated	34	Spherical	100	Gammaproteobacteria	Enterobacteriaceae	S. dysenteriae	36	42
ZNO	Uncoated	34	Spherical	25	Gammaproteobacteria	Enterobacteriaceae	S. paratyphi	36	25
ZNO	Uncoated	34	Spherical	50	Gammaproteobacteria	Enterobacteriaceae	S. paratyphi	36	30
ZNO	Uncoated	34	Spherical	75	Gammaproteobacteria	Enterobacteriaceae	S. paratyphi	36	37
ZNO	Uncoated	34	Spherical	100	Gammaproteobacteria	Enterobacteriaceae	S. paratyphi	36	40
ZNO	Uncoated	34	Spherical	25	Saccharomycetes	Saccharomycetaceae	C. albicans	84	20
ZNO	Uncoated	34	Spherical	50	Saccharomycetes	Saccharomycetaceae	C. albicans	84	22
ZNO	Uncoated	34	Spherical	75	Saccharomycetes	Saccharomycetaceae	C. albicans	84	25
ZNO	Uncoated	34	Spherical	100	Saccharomycetes	Saccharomycetaceae	C. albicans	84	34
ZNO	Uncoated	34	Spherical	25	Eurotiomycetes	Trichocomaceae	A. niger	84	20
ZNO	Uncoated	34	Spherical	50	Eurotiomycetes	Trichocomaceae	A. niger	84	23
ZNO	Uncoated	34	Spherical	75	Eurotiomycetes	Trichocomaceae	A. niger	84	26
ZNO	Uncoated	34	Spherical	100	Eurotiomycetes	Trichocomaceae	A. niger	84	30
ZNO	Uncoated	40	Spherical	NA	Bacilli	Staphylococcaceae	S. aureus	36	22
ZNO	Uncoated	40	Spherical	NA	Bacilli	Bacillaceae	B. subtilis	36	16
ZNO	Uncoated	40	Spherical	NA	Gammaproteobacteria	Morganellaceae	P. vulgaris	36	17
ZNO	Uncoated	40	Spherical	NA	Gammaproteobacteria	Pseudomonadaceae	P. aeruginosa	36	19
ZNO	Uncoated	40	Spherical	NA	Saccharomycetes	Saccharomycetaceae	C. albicans	84	18
ZNO	Uncoated	40	Spherical	NA	Eurotiomycetes	Trichocomaceae	A. niger	84	17
ZNO	Uncoated	30	Hexagonal	NA	Bacilli	Bacillaceae	B. subtilis	36	20
ZNO	Uncoated	30	Hexagonal	NA	Bacilli	Bacillaceae	B. cereus	36	21
ZNO	Uncoated	30	Hexagonal	NA	Bacilli	Staphylococcaceae	S. aureus	36	28
ZNO	Uncoated	30	Hexagonal	NA	Gammaproteobacteria	Enterobacteriaceae	E. coli	36	23
ZNO	Uncoated	30	Hexagonal	NA	Gammaproteobacteria	Pseudomonadaceae	P. aeruginosa	36	22
ZNO	Uncoated	30	Hexagonal	NA	Gammaproteobacteria	Enterobacteriaceae	K. pneumoniae	36	19
ZNO	Uncoated	30	Hexagonal	NA	Saccharomycetes	Saccharomycetaceae	C. albicans	84	24
ZNO	Uncoated	30	Hexagonal	NA	Eurotiomycetes	Trichocomaceae	A. niger	84	18
ZNO	Uncoated	42.5	Spherical	NA	Gammaproteobacteria	Enterobacteriaceae	E. coli	24	20
ZNO	Uncoated	42.5	Spherical	NA	Gammaproteobacteria	Enterobacteriaceae	E. coli	24	21
ZNO	Uncoated	42.5	Spherical	NA	Gammaproteobacteria	Enterobacteriaceae	E. coli	24	23
ZNO	Coated	90	Spherical	20	Bacilli	Staphylococcaceae	S. aureus	24	16
ZNO	Coated	90	Spherical	20	Gammaproteobacteria	Enterobacteriaceae	E. coli	24	14
ZNO	Uncoated	20	Spherical	625	Bacilli	Staphylococcaceae	S. aureus	24	16
ZNO	Uncoated	NA	Spherical	80	Gammaproteobacteria	Enterobacteriaceae	E. coli	24	14
ZNO	Uncoated	30.5	Spherical	NA	Bacilli	Staphylococcaceae	S. aureus	36	10
ZNO	Uncoated	30.5	Spherical	NA	Bacilli	Bacillaceae	B. subtilis	36	10
ZNO	Uncoated	30.5	Spherical	NA	Gammaproteobacteria	Enterobacteriaceae	K. pneumoniae	36	14
ZNO	Uncoated	30.5	Spherical	NA	Gammaproteobacteria	Enterobacteriaceae	E. coli	36	20
ZNO	Uncoated	30.5	Spherical	NA	Gammaproteobacteria	Enterobacteriaceae	E. aerogenes	36	36
ZNO	Uncoated	65	NA	1280	Bacilli	Staphylococcaceae	S. aureus	18	30
ZNO	Uncoated	65	NA	516	Bacilli	Staphylococcaceae	S. aureus	18	26
ZNO	Uncoated	65	NA	256	Bacilli	Staphylococcaceae	S. aureus	18	22
ZNO	Uncoated	65	NA	125	Bacilli	Staphylococcaceae	S. aureus	18	31
ZNO	Uncoated	65	NA	1028	Bacilli	Staphylococcaceae	S. aureus	18	31
ZNO	Uncoated	65	NA	1280	Gammaproteobacteria	Enterobacteriaceae	E. coli	18	29
ZNO	Uncoated	65	NA	516	Gammaproteobacteria	Enterobacteriaceae	E. coli	18	26
ZNO	Uncoated	65	NA	256	Gammaproteobacteria	Enterobacteriaceae	E. coli	18	22
ZNO	Uncoated	65	NA	125	Gammaproteobacteria	Enterobacteriaceae	E. coli	18	31
ZNO	Uncoated	65	NA	1028	Gammaproteobacteria	Enterobacteriaceae	E. coli	18	28
ZNO	Uncoated	65	NA	1280	Gammaproteobacteria	Pseudomonadaceae	P. aeruginosa	18	24
ZNO	Uncoated	65	NA	516	Gammaproteobacteria	Pseudomonadaceae	P. aeruginosa	18	26
ZNO	Uncoated	65	NA	256	Gammaproteobacteria	Pseudomonadaceae	P. aeruginosa	18	21
ZNO	Uncoated	65	NA	125	Gammaproteobacteria	Pseudomonadaceae	P. aeruginosa	18	23
ZNO	Uncoated	65	NA	1028	Gammaproteobacteria	Pseudomonadaceae	P. aeruginosa	18	31
ZNO	Uncoated	65	NA	1280	Bacilli	Staphylococcaceae	S. aureus	18	24
ZNO	Uncoated	65	NA	516	Bacilli	Staphylococcaceae	S. aureus	18	27
ZNO	Uncoated	65	NA	256	Bacilli	Staphylococcaceae	S. aureus	18	28
ZNO	Uncoated	65	NA	125	Bacilli	Staphylococcaceae	S. aureus	18	31
ZNO	Uncoated	65	NA	1028	Bacilli	Staphylococcaceae	S. aureus	18	29
ZNO	Uncoated	65	NA	1280	Gammaproteobacteria	Pseudomonadaceae	P. aeruginosa	18	26
ZNO	Uncoated	65	NA	516	Gammaproteobacteria	Pseudomonadaceae	P. aeruginosa	18	20
ZNO	Uncoated	65	NA	256	Gammaproteobacteria	Pseudomonadaceae	P. aeruginosa	18	14
ZNO	Uncoated	65	NA	125	Gammaproteobacteria	Pseudomonadaceae	P. aeruginosa	18	21
ZNO	Uncoated	65	NA	1028	Gammaproteobacteria	Pseudomonadaceae	P. aeruginosa	18	20
ZNO	Coated	27.5	Spherical	2000	Bacilli	Bacillaceae	B. subtilis	24	19
ZNO	Coated	27.5	Spherical	1000	Bacilli	Bacillaceae	B. subtilis	24	17
ZNO	Coated	27.5	Spherical	500	Bacilli	Bacillaceae	B. subtilis	24	12
ZNO	Coated	27.5	Spherical	250	Bacilli	Bacillaceae	B. subtilis	24	19
ZNO	Coated	27.5	Spherical	2000	Bacilli	Staphylococcaceae	S. aureus	24	16
ZNO	Coated	27.5	Spherical	1000	Bacilli	Staphylococcaceae	S. aureus	24	13
ZNO	Coated	27.5	Spherical	500	Bacilli	Staphylococcaceae	S. aureus	24	11
ZNO	Coated	27.5	Spherical	250	Bacilli	Staphylococcaceae	S. aureus	24	14
ZNO	Coated	27.5	Spherical	2000	Gammaproteobacteria	Enterobacteriaceae	E. coli	24	13
ZNO	Coated	27.5	Spherical	1000	Gammaproteobacteria	Enterobacteriaceae	E. coli	24	10
ZNO	Coated	27.5	Spherical	500	Gammaproteobacteria	Enterobacteriaceae	E. coli	24	0
ZNO	Coated	27.5	Spherical	250	Gammaproteobacteria	Enterobacteriaceae	E. coli	24	14
ZNO	Coated	27.5	Spherical	2000	Gammaproteobacteria	Pseudomonadaceae	P. aeruginosa	24	13
ZNO	Coated	27.5	Spherical	1000	Gammaproteobacteria	Pseudomonadaceae	P. aeruginosa	24	10
ZNO	Coated	27.5	Spherical	500	Gammaproteobacteria	Pseudomonadaceae	P. aeruginosa	24	0
ZNO	Coated	100	Hexagonal	10000	Bacilli	Staphylococcaceae	S. aureus	24	2
ZNO	Coated	100	Hexagonal	20000	Bacilli	Staphylococcaceae	S. aureus	24	2.2
ZNO	Coated	100	Hexagonal	30000	Bacilli	Staphylococcaceae	S. aureus	24	2.2
ZNO	Coated	100	Hexagonal	40000	Bacilli	Staphylococcaceae	S. aureus	24	2.3
ZNO	Coated	100	Hexagonal	50000	Bacilli	Staphylococcaceae	S. aureus	24	1.4
ZNO	Coated	100	Hexagonal	10000	Gammaproteobacteria	Enterobacteriaceae	E. coli	24	1.6
ZNO	Coated	100	Hexagonal	20000	Gammaproteobacteria	Enterobacteriaceae	E. coli	24	1.7
ZNO	Coated	100	Hexagonal	30000	Gammaproteobacteria	Enterobacteriaceae	E. coli	24	1.8
ZNO	Coated	100	Hexagonal	40000	Gammaproteobacteria	Enterobacteriaceae	E. coli	24	2
ZNO	Coated	100	Hexagonal	50000	Gammaproteobacteria	Enterobacteriaceae	E. coli	24	1.2
ZNO	Coated	100	Hexagonal	10000	Gammaproteobacteria	Enterobacteriaceae	K. pneumoniae	24	1.5
ZNO	Coated	100	Hexagonal	20000	Gammaproteobacteria	Enterobacteriaceae	K. pneumoniae	24	1.7
ZNO	Coated	100	Hexagonal	30000	Gammaproteobacteria	Enterobacteriaceae	K. pneumoniae	24	2
ZNO	Coated	100	Hexagonal	40000	Gammaproteobacteria	Enterobacteriaceae	K. pneumoniae	24	2.5
ZNO	Coated	100	Hexagonal	50000	Gammaproteobacteria	Enterobacteriaceae	K. pneumoniae	24	0
ZNO	Uncoated	41	Hexagonal	10000	Bacilli	Staphylococcaceae	S. aureus	24	1
ZNO	Uncoated	41	Hexagonal	20000	Bacilli	Staphylococcaceae	S. aureus	24	2
ZNO	Uncoated	41	Hexagonal	30000	Bacilli	Staphylococcaceae	S. aureus	24	3
ZNO	Uncoated	41	Hexagonal	40000	Bacilli	Staphylococcaceae	S. aureus	24	4
ZNO	Uncoated	41	Hexagonal	50000	Bacilli	Staphylococcaceae	S. aureus	24	0
ZNO	Uncoated	41	Hexagonal	10000	Gammaproteobacteria	Enterobacteriaceae	E. coli	24	1
ZNO	Uncoated	41	Hexagonal	20000	Gammaproteobacteria	Enterobacteriaceae	E. coli	24	1
ZNO	Uncoated	41	Hexagonal	30000	Gammaproteobacteria	Enterobacteriaceae	E. coli	24	1.3
ZNO	Uncoated	41	Hexagonal	40000	Gammaproteobacteria	Enterobacteriaceae	E. coli	24	1.5
ZNO	Uncoated	41	Hexagonal	50000	Gammaproteobacteria	Enterobacteriaceae	E. coli	24	1.4
ZNO	Uncoated	41	Hexagonal	10000	Gammaproteobacteria	Enterobacteriaceae	K. pneumoniae	24	1.5
ZNO	Uncoated	41	Hexagonal	20000	Gammaproteobacteria	Enterobacteriaceae	K. pneumoniae	24	1.6
ZNO	Uncoated	41	Hexagonal	30000	Gammaproteobacteria	Enterobacteriaceae	K. pneumoniae	24	1.6
ZNO	Uncoated	41	Hexagonal	40000	Gammaproteobacteria	Enterobacteriaceae	K. pneumoniae	24	1.7
ZNO	Uncoated	41	Hexagonal	NA	Gammaproteobacteria	Enterobacteriaceae	K. pneumoniae	24	12
ZNO	Uncoated	NA	NA	100	Bacilli	Staphylococcaceae	S. aureus	17	14.5
ZNO	Uncoated	NA	NA	200	Bacilli	Staphylococcaceae	S. aureus	17	16
ZNO	Uncoated	NA	NA	500	Bacilli	Staphylococcaceae	S. aureus	17	14
ZNO	Uncoated	NA	NA	100	Bacilli	Staphylococcaceae	S. aureus	17	16
ZNO	Uncoated	NA	NA	200	Bacilli	Staphylococcaceae	S. aureus	17	17
ZNO	Coated	100	Rod	NA	Bacilli	Bacillaceae	B. subtilis	17	7
ZNO	Coated	100	Rod	NA	Gammaproteobacteria	Enterobacteriaceae	E. coli	17	7
ZNO	Coated	100	Rod	NA	Gammaproteobacteria	Enterobacteriaceae	K. pneumoniae	17	8
ZNO	Coated	100	Rod	NA	Gammaproteobacteria	Pseudomonadaceae	P. aeruginosa	17	7.6
ZNO	Coated	100	Rod	NA	Gammaproteobacteria	Enterobacteriaceae	S. typhi	17	7.3
ZNO	Coated	100	Rod	NA	Bacilli	Staphylococcaceae	S. aureus	17	4.5
ZNO	Coated	100	Rod	NA	Bacilli	Bacillaceae	B. subtilis	17	14.2
ZNO	Coated	100	Rod	NA	Gammaproteobacteria	Enterobacteriaceae	E. coli	17	14.2
ZNO	Coated	100	Rod	NA	Gammaproteobacteria	Enterobacteriaceae	K. pneumoniae	17	14.2
ZNO	Coated	100	Rod	NA	Gammaproteobacteria	Pseudomonadaceae	P. aeruginosa	17	15.9
ZNO	Coated	100	Rod	NA	Gammaproteobacteria	Enterobacteriaceae	S. typhi	17	14.2
ZNO	Coated	100	Rod	NA	Bacilli	Staphylococcaceae	S. aureus	17	14.2
ZNO	Uncoated	100	Spherical	NA	Bacilli	Bacillaceae	B. subtilis	17	12
ZNO	Uncoated	100	Spherical	NA	Gammaproteobacteria	Enterobacteriaceae	E. coli	17	14
ZNO	Uncoated	100	Spherical	NA	Gammaproteobacteria	Enterobacteriaceae	K. pneumoniae	17	16
ZNO	Uncoated	100	Spherical	NA	Gammaproteobacteria	Pseudomonadaceae	P. aeruginosa	17	19
ZNO	Uncoated	100	Spherical	NA	Gammaproteobacteria	Enterobacteriaceae	S. typhi	17	15
ZNO	Uncoated	100	Spherical	NA	Bacilli	Staphylococcaceae	S. aureus	17	11
